Zimmerli, Allegretti et al

# 1 Nuclear pores constrict upon energy 2 depletion

3

4

5 Christian E. Zimmerli\*<sup>1,2,5</sup>, Matteo Allegretti\*<sup>1</sup>, Vasileios Rantos<sup>3,4</sup>, Sara K. Goetz<sup>1,2</sup>, Agnieszka  
6 Obarska-Kosinska<sup>4,6</sup>, Ievgeniia Zagoriy<sup>1</sup>, Aliaksandr Halavatyi<sup>5</sup>, Julia Mahamid<sup>1</sup>, Jan  
7 Kosinski<sup>1,3,4</sup> and Martin Beck<sup>1,6</sup>

8

9 \* Contributed equally

10

11 Correspondence to [jan.kosinski@embl.de](mailto:jan.kosinski@embl.de) or [martin.beck@biophys.mpg.de](mailto:martin.beck@biophys.mpg.de)

12

## 13 Affiliations:

14 1 Structural and Computational Biology Unit, European Molecular Biology Laboratory,  
15 Meyerhofstraße 1, 69117, Heidelberg, Germany

16 2 Collaboration for joint PhD degree between EMBL and Heidelberg University, Faculty of  
17 Biosciences

18 3 Centre for Structural Systems Biology (CSSB), Notkestraße 85, 22607, Hamburg, Germany

19 4 European Molecular Biology Laboratory Hamburg, Notkestraße 85, 22607, Hamburg,  
20 Germany

21 5 Advanced Light Microscopy Facility, European Molecular Biology Laboratory,  
22 Meyerhofstraße 1, 69117, Heidelberg, Germany

23 6 Department of Molecular Sociology, Max Planck Institute of Biophysics, Max-von-Laue-  
24 Straße 3, 60438 Frankfurt am Main

25

26 **Keywords:** nuclear pore complex, cryo-FIB milling, cryo-electron tomography, nuclear  
27 transport

28

Zimmerli, Allegretti et al

29 **Abstract**

30 Nuclear pore complexes (NPCs) fuse the inner and outer nuclear membranes and mediate  
31 nucleocytoplasmic exchange. They are made of 30 different nucleoporins that form an  
32 intricate cylindrical architecture around an aqueous central channel. This architecture is  
33 highly dynamic in space and time. Variations in NPC diameter were reported, but the  
34 physiological circumstances and the molecular details remain unknown. Here we combined  
35 cryo-electron tomography and subtomogram averaging with integrative structural modeling  
36 to capture a molecular movie of the respective large-scale conformational changes *in cellulo*.  
37 While actively transporting NPCs adopt a dilated conformation, they strongly constrict upon  
38 cellular energy depletion. Fluorescence recovery after photo bleaching experiments show  
39 that NPC constriction is concomitant with reduced diffusion and active transport across the  
40 nuclear envelope. Our data point to a model where the energy status of cells is linked to the  
41 conformation of NPC architecture.

Zimmerli, Allegretti et al

## 42 **Introduction**

43 Nuclear pore complexes (NPCs) bridge the nuclear envelope (NE) and facilitate  
44 nucleocytoplasmic transport. Across the eukaryotic kingdom, about 30 different genes  
45 encode for NPC components, termed nucleoporins (Nups). Although specialized Nups have  
46 been identified in many species, extensive biochemical and structural studies *in vitro* led to  
47 the consensus that the core scaffold inventory is conserved. It consists of several Nup  
48 subcomplexes that come together in multiple copies to form an assembly of eight asymmetric  
49 units, called spokes, that are arranged in a rotationally symmetric fashion (1). The Y-complex  
50 (also called Nup107 complex) is the major component of the outer rings (the nuclear and  
51 cytoplasmic rings; NR and CR), which are placed distally into the nuclear and cytoplasmic  
52 compartments. The inner ring complex scaffolds the inner ring (IR; also called spoke ring) that  
53 resides at the fusion plane of the nuclear membranes. The Nup159 complex (also called P-  
54 complex) asymmetrically associates with the Y-complex of the cytoplasmic ring and mediates  
55 mRNA export. Despite these common features of quaternary structure, *in situ* structural  
56 biology studies have revealed that the higher order assembly is variable across the eukaryotic  
57 kingdom (2).

58

59 In addition to compositional variability across different species, NPC architecture is  
60 conformationally highly dynamic and variations in NPC diameter have been observed in  
61 various species and using different methods (3–7). It has been shown that dilation is part of  
62 the NPC assembly process (8, 9). However, if NPC dilation and constriction may play a role  
63 during active nuclear transport (10), or are required to open up peripheral channels for the  
64 import of inner nuclear membrane proteins (11–13), remains controversial. It is difficult to  
65 conceive that such large-scale conformational changes can occur on similar time scales as  
66 individual transport events (14, 15), which would be the essence of a physical gate.  
67 Nevertheless, several cues that potentially could affect NPC diameter have been suggested,  
68 such as exposure to mechanical NE stress, mutated forms of Importin  $\beta$ , varying  $\text{Ca}^{2+}$   
69 concentrations or hexanediol (7, 16–21). However, these previous studies did neither explore  
70 NPC diameter and its functional consequences within intact cellular environments nor did  
71 they structurally analyze the conformational changes of nuclear pores in molecular detail.  
72 Thus, physiological cause and consequence along with the molecular mechanisms of NPC  
73 dilation and constriction remain enigmatic.

Zimmerli, Allegretti et al

74

75 Active nuclear transport of cargo relies on energy supply. Importin or exportin-mediated  
76 transport requires the small GTPase RAN that binds either GTP in the nucleus or GDP in the  
77 cytoplasm to ensure directionality of transport (22), while mRNA export is directly ATP  
78 dependent (23). Cells of various organisms including *Schizosaccharomyces pombe* show a  
79 rapid shut down of active nuclear transport and mRNA export when depleted of ATP (24–26).  
80 This points to a well conserved mechanism, likely dependent on a concomitantly reduced  
81 availability of free GTP (27). Moreover, energy depletion (ED) leads to a general  
82 reorganization of the cytoplasm including solidification of the periplasm, general water loss  
83 and reduction of the nuclear and cellular volume, which allows cells to endure under  
84 unfavorable conditions (28–31). If the shutdown of active nuclear transport coincides with  
85 the alteration in passive diffusion and potentially a conformational adaption of NPC  
86 architecture remains unknown.

87

88 Here we demonstrate that in *S. pombe* NPCs (SpNPCs) constrict under conditions of ED, which  
89 is concomitant with a reduction of both, free diffusion and active nuclear transport across the  
90 nuclear envelope. Using *in cellulo* cryo-electron microscopy (cryo-EM) and integrative  
91 structural modeling, we captured a molecular movie of NPC constriction. Our dynamic  
92 structural model suggests large scale conformational changes that occur by movements of  
93 the spokes with respect to each other but largely preserve the arrangement of individual  
94 subcomplexes. Previous structural models obtained from isolated nuclear envelopes (32–37)  
95 thereby represent the most constricted NPC state.

96

### 97 ***In cellulo* cryo-EM map of the *S. pombe* NPC**

98 To study NPC architecture and function *in cellulo* at the best possible resolution and structural  
99 preservation, we explored various genetically tractable model organisms for their  
100 compatibility with cryo-focused ion beam (FIB) specimen thinning, cryo-electron tomography  
101 and subtomogram averaging (STA). *Saccharomyces cerevisiae* cells were compatible with high  
102 throughput generation of cryo-lamellae and acquisition of tomograms. STA of their NPCs  
103 resulted in moderately resolved structures (4). In contrast, a larger set of cryo-tomograms  
104 from *Chaetomium thermophilum* cells did not yield any meaningful averages, possibly  
105 because their NPCs displayed a very large structural variability. We therefore chose to work

Zimmerli, Allegretti et al

106 with *S. pombe* cells that are small enough for thorough vitrification, offer a superior geometry  
107 for FIB-milling compared to *C. thermophilum* with the advantage of covering multiple cells  
108 and, compared to *S. cerevisiae*, higher number of NEs and NPCs per individual cryo-lamellae  
109 and tomogram, leading to high data throughput (**Fig. S1**).

110

111 To obtain a high quality cryo-EM map of *S. pombe* NPCs, we prepared cryo-FIB milled lamellae  
112 of exponentially growing *S. pombe* cells and acquired 178 tomograms from which we  
113 extracted 726 NPCs. Subsequent STA resulted in an *in cellulo* NPC average of very high quality  
114 in terms of both visible features (**Fig. 1A, B and Fig. S2A**) and resolution (**Fig. S2B**). Systematic  
115 fitting of the *S. pombe* IR asymmetric unit model (see Materials and Methods), resulted in a  
116 highly significant fit (**Fig S3A**). The subsequent refinement with integrative modeling led to a  
117 structural model that explains the vast majority of the observed electron optical density in  
118 the IR (**Fig. 1B, Fig. S4, and Video S1**). The IR architecture appears reminiscent to NPC  
119 structures of other eukaryotes (**Fig. S5**) further corroborating its evolutionary conservation  
120 (1).

121

122 Although the outer rings are known to be more variable, the intra-subcomplex interaction  
123 network of the Y-complex (Nup120, Nup85, Nup145C, Sec13, Nup84 and Nup133) has been  
124 comprehensively characterized by many studies and considered to be conserved (1) (see  
125 **Table S1** for nomenclature of Nups across different species). Systematic fitting revealed that  
126 the NR of the SpNPC is composed of two concentric Y-complex rings (**Fig. 1A, Fig. S3B and**  
127 **Video S1**) as in vertebrates and algae but as opposed to the single Y-complex ring observed  
128 in *S. cerevisiae* (**Fig. S2A**) (4, 35, 38). Integrative modeling of the entire Y-complex ensemble  
129 of the NR revealed a rather classical Y-complex architecture with the typical head-to-tail  
130 oligomerization (**Fig. 2A and Fig. S4**). This analysis emphasizes that *S. pombe* Y-complex Nups  
131 do localize to the NR, contrasting previous proposals (39). The homology models of SpNup131  
132 and SpNup132 fit to the Y-complex tail region equally well, rendering these two proteins  
133 indistinguishable by our approach.

134

135 Closer inspection of the cytoplasmic side of cryo-EM map revealed a surprising and  
136 unprecedented architectural outline, since it did not form a ring. Instead, eight spatially  
137 separated entities were observed (**Fig. 1A**) suggesting that the integrity of the cylindrical

Zimmerli, Allegretti et al

138 outline is rather provided by the IR and NR while the cytoplasmic protein entities serve as a  
139 mere anchor point for the mRNA export platform, the Nup159 complex (**Fig. 2B**). Although  
140 the dynein-arm that is characteristic for the *S. cerevisiae* NPC (40) is lacking, the Nup159  
141 complex resembles its *S. cerevisiae* counterpart in shape (**Fig. S6A**). Systematic fitting and  
142 subsequent refinement with integrative modeling revealed that the Y-complex vertex fits into  
143 the density observed at the cytoplasmic side (**Fig. 2B, Fig. S3C, Fig. S4 and Video S1**). The  
144 density potentially accounting for Nup107 and SpNup131/SpNup132 was missing (**Fig. S3D**)  
145 and could not be recovered by local refinement (**Fig. S6B**). Instead, the observed density  
146 sharply declined at the edge of SpNup189C consistent with previous work suggesting a split  
147 of the SpNup189C-Nup107 interface (**Fig. S6C**) (39, 41). To independently confirm the identity  
148 of the observed vertex-like density, we analyzed *nup37Δ* and *nup37Δ-ely5Δ* strains in which  
149 non-essential, peripheral Y-complex Nups were deleted. The binding of both, Nup37 and Ely5  
150 to Nup120 has been previously shown *in vitro* (42, 43), and as expected, density was missing  
151 in the respective positions of all Y-complexes (**Fig. 2C-D and Fig. S7A-B**). Unexpectedly, a  
152 density that could accommodate Ely5 homology model was missing also in the cytoplasmic Y-  
153 complex, suggesting that Ely5 is present in *S. pombe* at both, the nuclear and the cytoplasmic  
154 side of the NPC (**Fig 2D and Video S1**) unlike in higher metazoans where its homolog ELYS is  
155 known to exclusively bind to the NR (35, 44). Otherwise, the NPC architecture remained  
156 mostly unchanged, despite some increased flexibility in the Nup120 arm of the outer nuclear  
157 Y-complex (**Fig. S7A-B**). These results unambiguously identify the density observed at the  
158 cytoplasmic side as *bona fide* Y-complex vertex.

159

### 160 **Energy depletion leads to constriction of NPC scaffold and central channel**

161 Previous cryo-EM structures of NPCs obtained from isolated nuclear envelopes (32–37) or by  
162 detergent extraction (45) had a smaller diameter as compared to those obtained from intact  
163 cells (3, 4, 38, 46). We therefore hypothesized that NPC diameter may depend on the  
164 biochemical energy level that is depleted during preparations of isolated nuclear envelopes  
165 or NPCs but may also be reduced within intact cells e.g. during stress conditions. We set out  
166 to systematically analyze the NPC architecture under conditions of energy depletion as  
167 compared to exponentially growing cells. We structurally analyzed 292 NPCs subsequent to  
168 1 hour of ED using non-hydrolysable 2-deoxy-glucose in combination with the respiratory  
169 chain inhibitor antimycin A (see Materials and Methods). We measured the diameter based

Zimmerli, Allegretti et al

170 on centroids of the spokes as obtained by STA (see Materials and Methods) and found a  
171 significant constriction of the mean central channel diameter during ED from  $\sim 70$  nm to  $\sim 55$   
172 nm (**Fig. 3A**). The variation of diameters was larger within the population of NPCs exposed to  
173 ED as compared to the actively transporting conditions, which likely blurred structural  
174 features during STA. To generate a conformationally more homogenous ensemble, we split  
175 the particles from the ED data set into two classes with central channel diameters of  $<50$  nm  
176 and  $>50$  nm (533 and 1012 subunits respectively) (**Fig. 3B**) and refined them separately to  $<28$   
177 Å resolution (**Fig. 3C-D and Fig. S8A-B**). Both conformations of the ED state showed a smaller  
178 NPC diameter compared to the control. The intermediate conformation was  $\sim 65$  nm wide at  
179 the IR while the most constricted conformation showed a diameter of  $\sim 49$  nm (**Fig. 3D**) and  
180 is thus comparable to the diameter observed in isolated NEs (32–37). We further calculated  
181 the diameters at the level of the cytoplasmic side and NR and found that all three rings  
182 constrict significantly during ED. While the diameter of the IR and cytoplasmic side changed  
183 their conformation most dramatically, the NR was less affected (**Fig. 3E, Videos S4-S6**). The  
184 estimated volume of the central channel in the most dilated state was almost twice as large  
185 ( $\sim 152'000$  nm<sup>3</sup>) as compared to the most constricted state ( $\sim 86'000$  nm<sup>3</sup>) (**Fig. S8C**), which  
186 likely translates to  $\sim 2$ -fold change in concentration of the FG-repeats contained therein.

187  
188 To better understand how NPCs accommodate such massive conformational changes on the  
189 molecular level, we systematically fitted individual subcomplexes (**Fig. S9**) and built structural  
190 models of the three different diameter states based on the cryo-EM maps (**Fig. 3C-D**) using a  
191 multi-state integrative modeling procedure (**Fig S4**). In the cytoplasmic side and the NR,  
192 conformational changes were limited to the curvature of the Y-complexes and inward-  
193 bending of the mRNA export platform towards the center of the pore (**Videos S4-6**). In  
194 contrast, the central channel constriction of the IR is more elaborate and mediated by a lateral  
195 displacement of the 8 spokes that move as independent entities to constrict or dilate the IR  
196 (**Fig. 3D and Videos S4-S6**). In the dilated state, around 3-4 nm wide gaps are formed in-  
197 between the neighboring spokes, while in the constricted state the spokes form extensive  
198 contacts (**Fig. S10A-B**), equivalent to those in the previously published structures of the  
199 human NPC in isolated nuclear envelopes (36). Notably, the spokes do not move entirely as  
200 rigid bodies, but some conformational changes occur within the Nup155 and Nsp1 complex  
201 regions (**Video S7 and S8**). Those are however distinct from the previously proposed

Zimmerli, Allegretti et al

202 conformational sliding (10) and rather consistent with an overall preserved intra-subcomplex  
203 arrangement (15, 47).

204

205 Interestingly, under conditions of ED additional density is arching out into the lumen of the  
206 NE (**Fig S10A and C**), contrasting control conditions under which they are less clearly  
207 discernible from the membrane. It has been previously proposed that such luminal structures  
208 are formed by Pom152 (ScPom152 or HsGP210) (48, 49). In terms of their shape, the observed  
209 arches are reminiscent to those observed in isolated *Xenopus laevis* (34). Our data imply that  
210 the luminal ring conformation becomes more prominent upon constriction. If this has any  
211 mechanical benefits to keep NPCs separated (34), or might rather limit the maximal dilation,  
212 remains to be further investigated.

213

#### 214 **NPC constriction is concomitant with reduced diffusion and active nuclear transport**

215 We wondered about the transport competence of NPCs in conditions under which they are  
216 constricted in comparison to actively transporting, dilated NPCs. To address this, we  
217 employed live cell imaging of *S. pombe* cells expressing a GFP variant tagged with a nuclear  
218 localization signal (NLS) on its N- and C-terminus (NLS-GFP) that shows a nuclear localization  
219 under control conditions (**Fig. 4A**). Already after 30 min of ED most of the NLS-GFP localized  
220 into the cytoplasm (**Fig. 4 B**), confirming that active nuclear import is suspended (26). To  
221 assess passive diffusion across the nuclear envelope, we performed fluorescence recovery  
222 after photobleaching (FRAP) experiments of nuclei in cells expressing freely diffusing GFP at  
223 different time points after ED as compared to control conditions (**Fig. 4C and Fig. S11A-B**) (see  
224 Materials and Methods). GFP diffusion rates into the nucleus were significantly decreased  
225 upon energy depletion (**Fig. 4C**), contrasting a minor, negligible effect observed within the  
226 cytoplasm (**Fig. S11C**). Passive diffusion was the slowest after about 1 hour of ED, the time at  
227 which we structurally analyzed NPC architecture and is thus concomitant with NPC  
228 constriction (**Fig. 4C**).

229

230 ED was shown to generally reduce cellular and nuclear volumes *S. pombe* cells (28, 29, 31).  
231 We therefore hypothesized that changes of diameter of the NPC could be a result of a reduced  
232 nuclear size that may reduce mechanical strain imposed onto the NPC scaffold by the nuclear  
233 membranes. As a proxy for nuclear size we quantified the median nuclear projection surface



Zimmerli, Allegretti et al

234 and indeed found a highly significant reduction from  $71 \mu\text{m}^2$  to  $<60 \mu\text{m}^2$  under conditions of  
235 ED (**Fig. 4D**), while NE staining based on Nup60-mCherry fluorescence indicated NE wrinkling  
236 (**Fig. 4A**). This data therefore points to a general shrinkage of nuclei during ED. For a spherical  
237 nucleus, the observed changes in nuclear projection area correspond to a reduction of  $\sim 15\%$   
238 in nuclear surface area and  $\sim 25\%$  in nuclear volume, which would be sufficient to cause a loss  
239 of NE tension (50) and may relax NPC scaffold into the constricted conformation (**Fig S12**).

240

## 241 **Discussion and Conclusion**

242 Here we have investigated the compositional and conformational plasticity of NPC  
243 architecture in intact cells. We demonstrate that SpNPC scaffold exhibits an unexpected  
244 subcomplex arrangement that is breaking the long-standing dogma of a three ringed  
245 architecture. Similar to vertebrates and green algae, two concentric Y-complex rings form the  
246 NR. On the cytoplasmic side, eight individual cytoplasmic Y-complex vertices that do not  
247 exhibit any head-to-tail connection and thus do not form a ring. Although we cannot entirely  
248 exclude that the Y-complex tail is flexible at the cytoplasmic side and was thus not resolved  
249 during averaging, several lines of evidence argue against this. Previous biochemical analysis  
250 was suggestive of less tightly associated tail and vertex portions of the Y-complex in *S. pombe*  
251 (41). Another investigation suggested a non-isostoichiometric assembly of Y-complex  
252 members *in vivo* (39) and structural analysis of the Y-complex from yet another fungus,  
253 namely *Myceliophthora thermophila*, had demonstrated *in vitro* that Nup145C forms a stable  
254 fold and associates with the vertex in absence of Nup107 (51). Although the Y-complex does  
255 contain hinges (32, 51–54) that are likely important to facilitate large scale conformational  
256 changes, the Nup189C-Nup107 interface is not known to be flexible. Taken together with the  
257 fact that the observed electron optical density sharply declines at the respective site, it is very  
258 likely that the interface between SpNup189C (HsNup96) and SpNup107, which was thought  
259 to be conserved, is not formed in the cytoplasm but only in the nucleoplasm. A recent study  
260 forced SpNup107 to the cytoplasmic side by expression of a SpNup189C-SpNup107 fusion  
261 protein which led to re-localization of SpNup131 to the cytoplasmic side (39), and thus further  
262 supports the here observed absence of the cytoplasmic Y-complex tail. How precisely *S.*  
263 *pombe* cells spatially segregate the two different types of Y-complexes remains uncertain.  
264 Our survey of public databases for splice variants, post-translational modifications and

Zimmerli, Allegretti et al

265 homologous structures did not yield significant clues. In contrast to vertebrates (35, 44), *S.*  
266 *pombe* Ely5 is a member of both the nuclear and the cytoplasmic Y-complex vertex. It appears  
267 plausible that ELYS acquired additional functional domains during evolution of open mitosis  
268 in metazoans such as the C-terminal disordered region and AT-hook to tether Y-complexes to  
269 NPC seeding sites on chromatin and consequently to the nuclear side of the NE.

270

271 We further show how conformational changes in NPC architecture mediate its constriction  
272 and dilation within intact cells in response to a defined physiological cue, namely the energy  
273 status of the cell. ED leads to a massive constriction of the central channel that results in a  
274 ~2-fold loss in volume and is concomitant with a reduction of passive diffusion across the NE,  
275 while active nuclear transport is completely shut down. If the observed reductions of  
276 molecular exchange are directly or indirectly related to the NPC constriction remains  
277 challenging to address, given the manifold processes occurring in cells entering quiescence in  
278 response to ED (28–30, 55, 56). It however appears plausible that a reduction of the nuclear  
279 pore central channel volume limits the diffusion rate. In fact it has been suggested that NPCs  
280 reduce the diffusion rate of passively translocating molecules in response to their molecular  
281 size, rather than showing a strict size exclusion threshold (57). It has been further shown that  
282 active nuclear transport does not enhance passive diffusion (58, 59) and several studies have  
283 shown that cytoplasmic diffusion of small proteins, such as soluble mCherry, is not  
284 significantly affected during ED (28). Finally, a recent study showed that the uptake and  
285 partitioning of both passively diffusing and nuclear transport factor (NTF)-like molecules by  
286 FG-domain *in vitro* is directly dependent on their concentration (60). All of which agrees  
287 well with our findings. It therefore is plausible that a constricted central channel volume leads  
288 to an increased local FG-domain concentration which in turn limits the passive diffusion of  
289 molecules of a constant size, similar to the diffusion limitation observed in response to  
290 increasing molecular size under control conditions.

291

292 Peripheral channels are thought to be important for the nuclear import of inner nuclear  
293 membrane proteins (11–13). Here we observed around 3-4 nm wide lateral gaps between the  
294 individual spokes of actively transporting NPCs. Notably, our data processing workflow yields  
295 an average of conformation under the respective conditions and individual spokes are even

Zimmerli, Allegretti et al

296 more dynamic ((6) and this study). Therefore, it is plausible that the opening and closing of  
297 peripheral channels may regulate the translocation of inner nuclear membrane proteins.

298

299 Based on crystal structures of fragments of the Nsp1 (HsNup62) complex, it had been  
300 previously suggested that NPCs undergo dilation cycles that involve refolding and alternative  
301 configurations of the coiled-coil domains of the complex (61). The conformational changes  
302 observed in this study are very different. They do not necessitate a rearrangement of  
303 subcomplex folds but are rather based on large scale movements (**Videos S4-S7**). Such  
304 movements may also be relevant during NPC assembly or turnover, where significant smaller  
305 diameters have been observed (4, 8, 9).

306

307 How ED mechanically leads to NPC constriction remains to be further addressed in the future.  
308 It appears likely that a reduced nuclear volume relieves NE tension and in turn allows NPCs to  
309 constrict (50). At this point, we cannot exclude additional factors such as the previously  
310 reported cellular pH-change during ED (28, 29) or the shut-down of active nuclear transport  
311 itself to have an effect on NTF occupancy and NPC conformation. However, mechanical  
312 tension on the NE and active nuclear transport are certainly diminished during NE or NPC  
313 isolation. Therefore, previous structural analysis of such preparations has yielded structures  
314 that correspond to the most constricted conformation at the very end of the scale.

315

316 In conclusion we show that NPCs within living cells populate a much larger conformational  
317 space and thereby confirm their importance as regulators of nucleocytoplasmic transport in  
318 response to environmental cues in living organisms on a cellular level. Hence our study  
319 highlights the power and importance of *in cellulo* structural analyzes to study such crucial  
320 physiological processes at the macromolecular level within the relevant cellular environment.

321

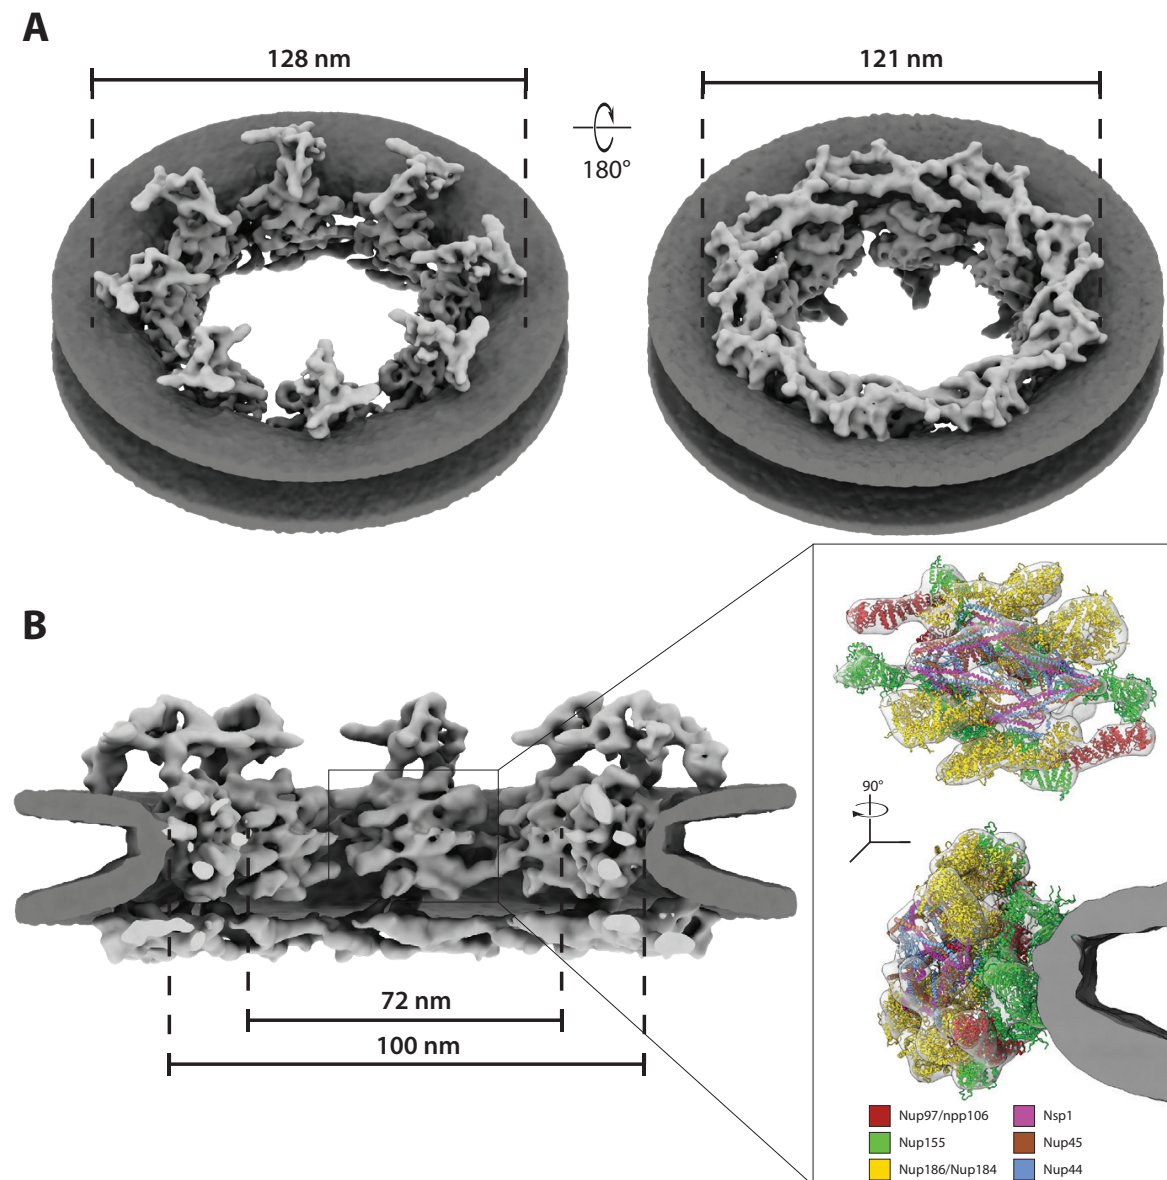

322

323 **Figure 1. *In cellulo* cryo-EM map of the *S. pombe* NPC.** A) Isosurface rendered views of the *S.*  
324 *pombe* NPC as seen from the cytoplasm (left) and the nucleoplasm (right; with membranes in  
325 dark and protein in light grey). While the cytoplasmic view (left) reveals eight disconnected  
326 protein entities instead of a cytoplasmic ring, the nuclear view (right) shows two concentric  
327 nuclear Y-complex rings. B) Same as (A) but shown as cutaway view. While the asymmetric  
328 curvature of the nuclear membranes and the arrangement of the cytoplasmic side is  
329 unprecedented in other species, the inner ring architecture is highly conserved as highlighted  
330 in the inset (see also **Fig. S5**). Fitting of inner ring nucleoporin homology models explains the  
331 vast majority of the observed electron optical density.

332

Zimmerli, Allegretti et al

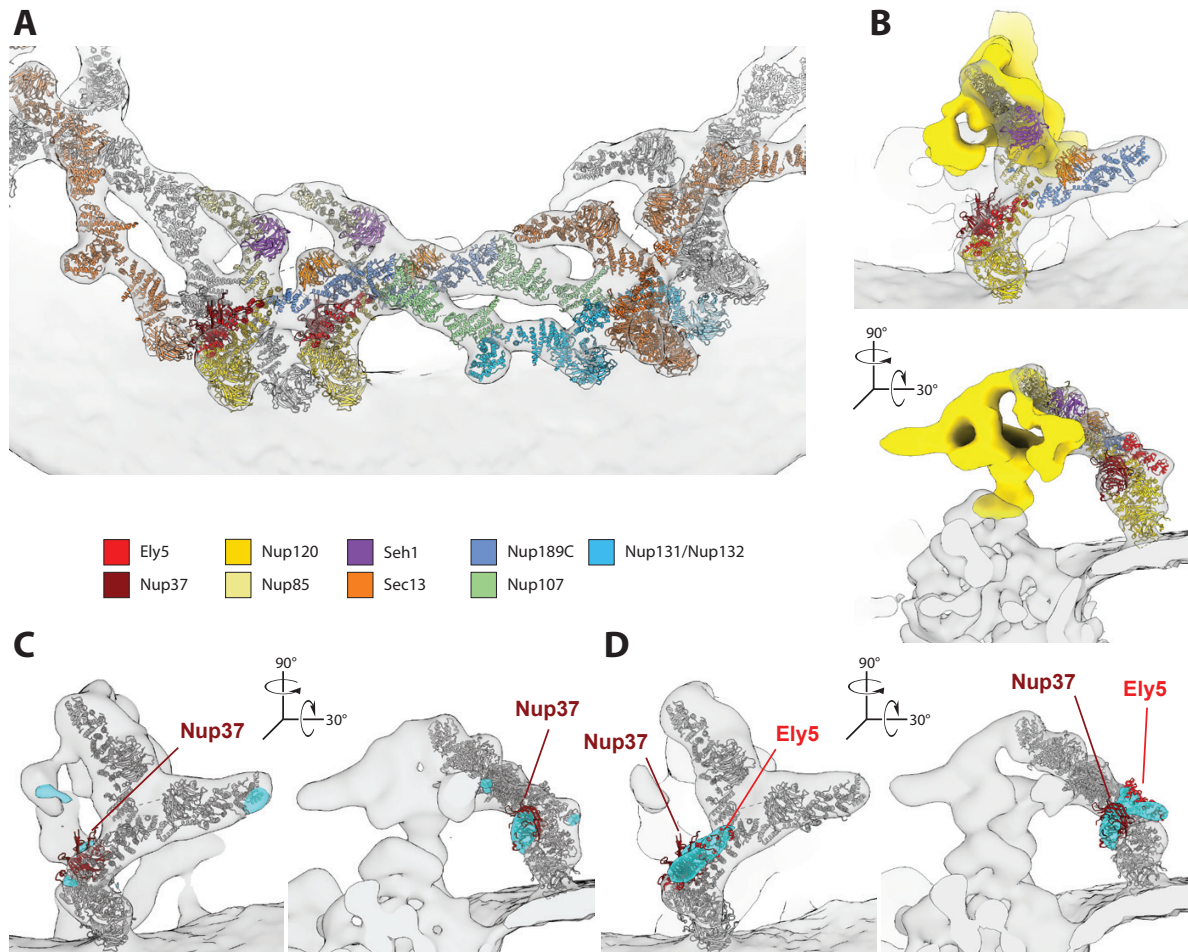

333

334 **Figure 2. Architecture of spNPC outer rings.** A) Systematic fitting and integrative modeling of  
 335 all *S. pombe* Y-complex nucleoporins reveals a head-to-tail arrangement with two concentric  
 336 Y-complex rings on the nuclear side of the SpNPC similar to humans. A segment of the NR of  
 337 the cryo-EM map is shown isosurface rendered in transparent light grey. The adjacent inner  
 338 Y-complexes are shown in grey and outer Y-complexes are shown in orange. B) Integrative  
 339 model of the cytoplasmic protein entities. The fit of the Y-complex vertex explains most of  
 340 the observed density. The mRNA export platform as identified in (4, 62) is segmented in  
 341 yellow. C, D) Verification of the molecular identity of the observed structure. C) The *nup37Δ*  
 342 cryo-EM map is shown in light grey and overlaid with the difference map (cyan) of the *wild*  
 343 *type* and *nup37Δ* maps, both filtered to 27 Å. The missing density in the long arm of the Y-  
 344 vertex coincides with the position of Nup37 (dark red) of the Y-complex vertex (dark grey,  
 345 as in A). D) *nup37Δ-ely5Δ* double knockout map (light grey) overlaid with the corresponding  
 346 difference map (cyan). Differences are apparent at the location of both, Nup37 (dark red) and  
 347 Ely5 (light red) with respect to the fitted Y-complex model (dark grey).

Zimmerli, Allegretti et al

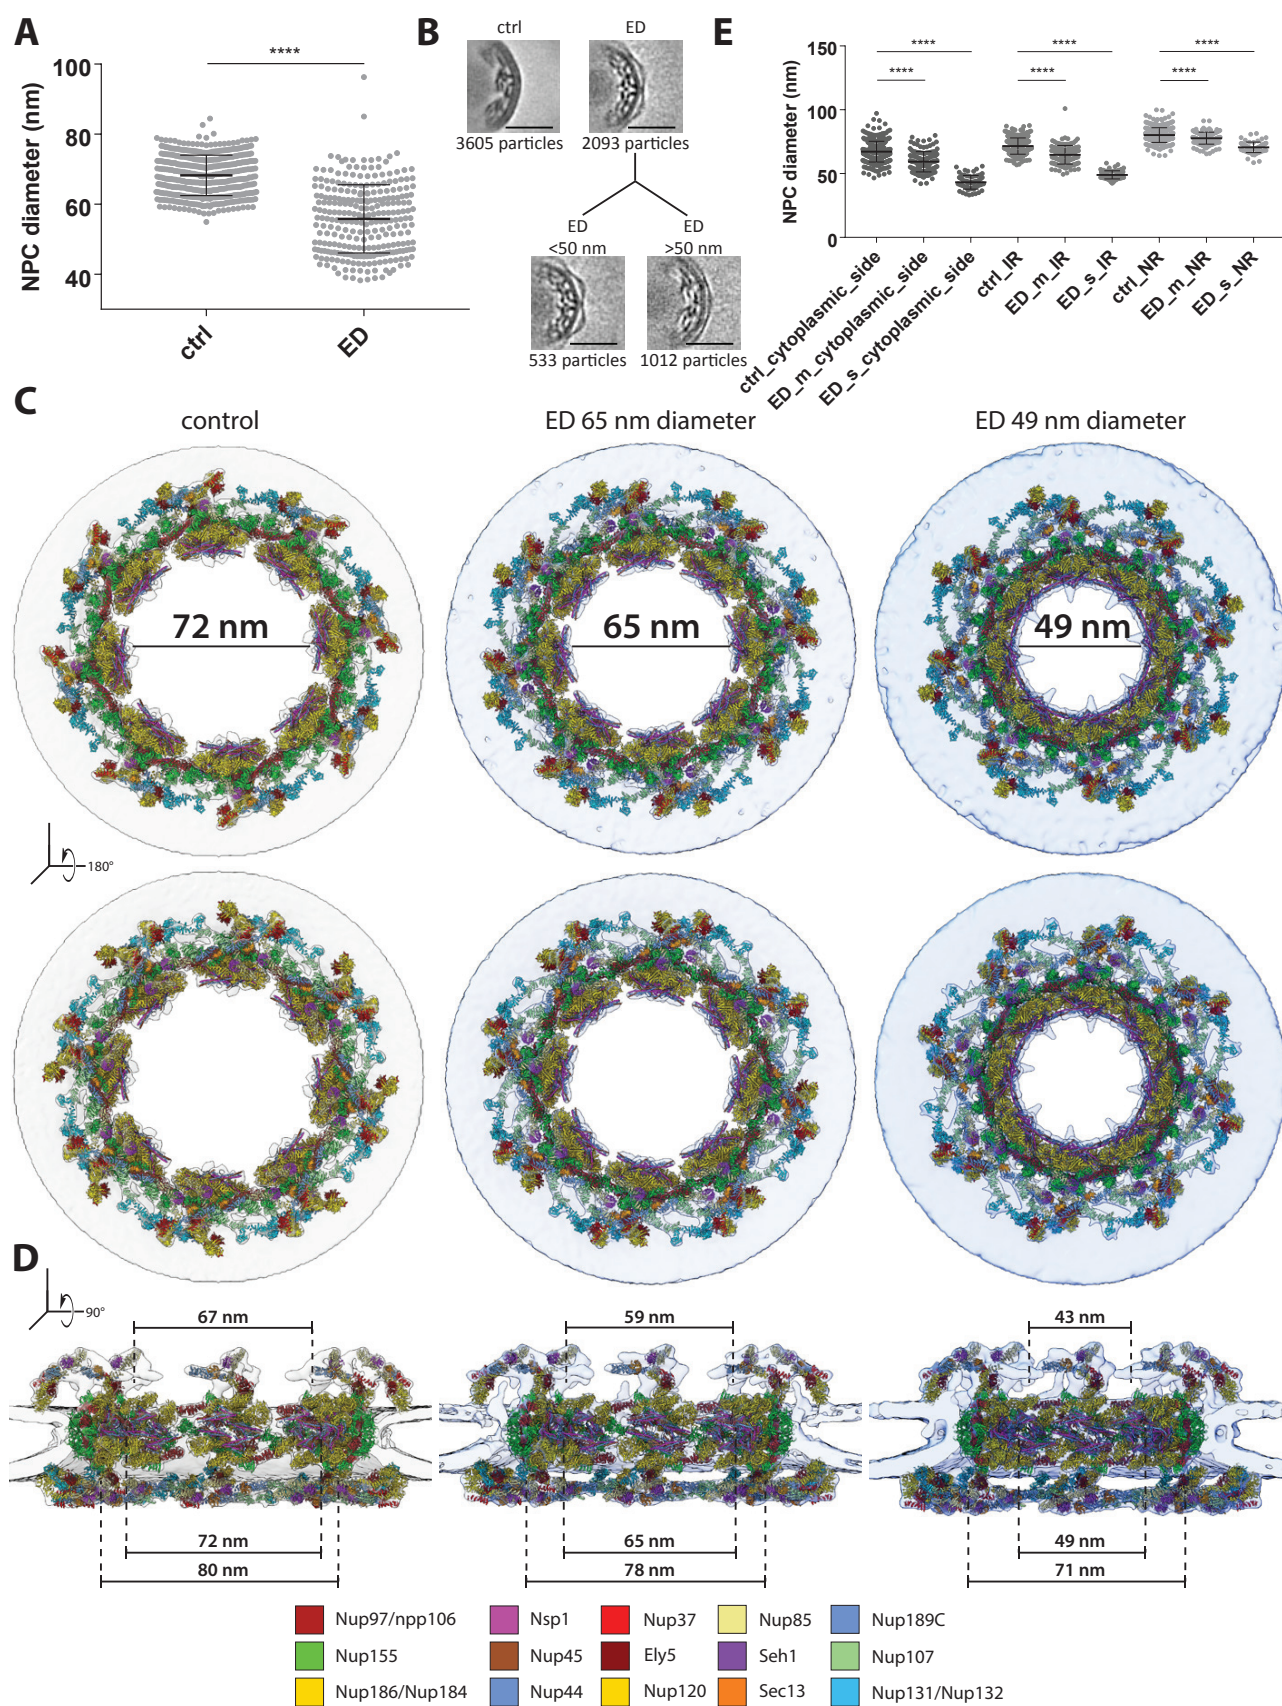

348

Zimmerli, Allegretti et al

349 **Figure 3. NPCs constrict upon energy depletion.** A) Diameter measurement of control  
350 (n=438) and energy depleted (n=271) NPCs based on subunit positions obtained by STA (see  
351 Materials and methods) reveals a significant constriction of NPCs upon ED (mean  $\pm$  standard  
352 error of mean (SdEM) control: 68.2 nm and mean ED: 55.84 nm, whiskers indicate standard  
353 deviation, p-value < 0.0001, two-sided t-test). B) Slices through subtomogram averages  
354 corresponding to (A) show the different conformations at the level of the IR. NPCs were  
355 divided into two classes with diameters of <50 nm (left) and >50 nm (right; scale bar: 50  
356 nm). C) Measurements of individual NPC diameters at the CR, IR and NR in control  
357 conditions and during ED reveal significant diameter constriction of all three rings (all p-  
358 values <0.0001; ctrl control; ED\_m represents the class with diameter of >50nm; ED\_s  
359 represents the class with diameter of <50 nm. Diameters mean  $\pm$  SdEM measured are: 67.25  
360  $\pm$  0.44, n=341 (ctrl\_cytoplasmic\_side); 59.29  $\pm$  0.6817, n=136 (ED\_m\_cytoplasmic\_side) and  
361 43.15  $\pm$  0.6509, n=68 (ED\_s\_cytoplasmic\_side); 71.59  $\pm$  0.3459, n=341 (ctrl\_IR); 64.73  $\pm$   
362 0.626, n=136 (ED\_m\_IR) and 49  $\pm$  0.3815, n=68 (ED\_s\_IR); 80.22  $\pm$  0.3106, n=341 (ctrl\_NR);  
363 77.71  $\pm$  0.4006, n=136 (ED\_m\_NR) and 70.59  $\pm$  0.5001, n=68, whiskers indicate standard  
364 deviation. D) Cytoplasmic view (top) and nuclear view (bottom) of cryo-EM maps  
365 superimposed with the respective integrative models from actively transporting,  
366 intermediate and fully constricted NPCs illustrating the overall conformational change  
367 leading to a central channel diameter constriction from 72 nm to 49 nm. The cytoplasmic  
368 and IR spokes move as individual entities and contribute the most to the central channel  
369 diameter change, whereas the NR constricts to a lesser extent. E) Same as (D) but show as  
370 cutaway side view. Upon constriction, the mRNA export platform bends towards the center  
371 of the NPC. Conformational changes of the NR are less dramatic and include mostly changes  
372 in the curvature of the Y complexes (see also supplementary videos 4-8).  
373

Zimmerli, Allegretti et al

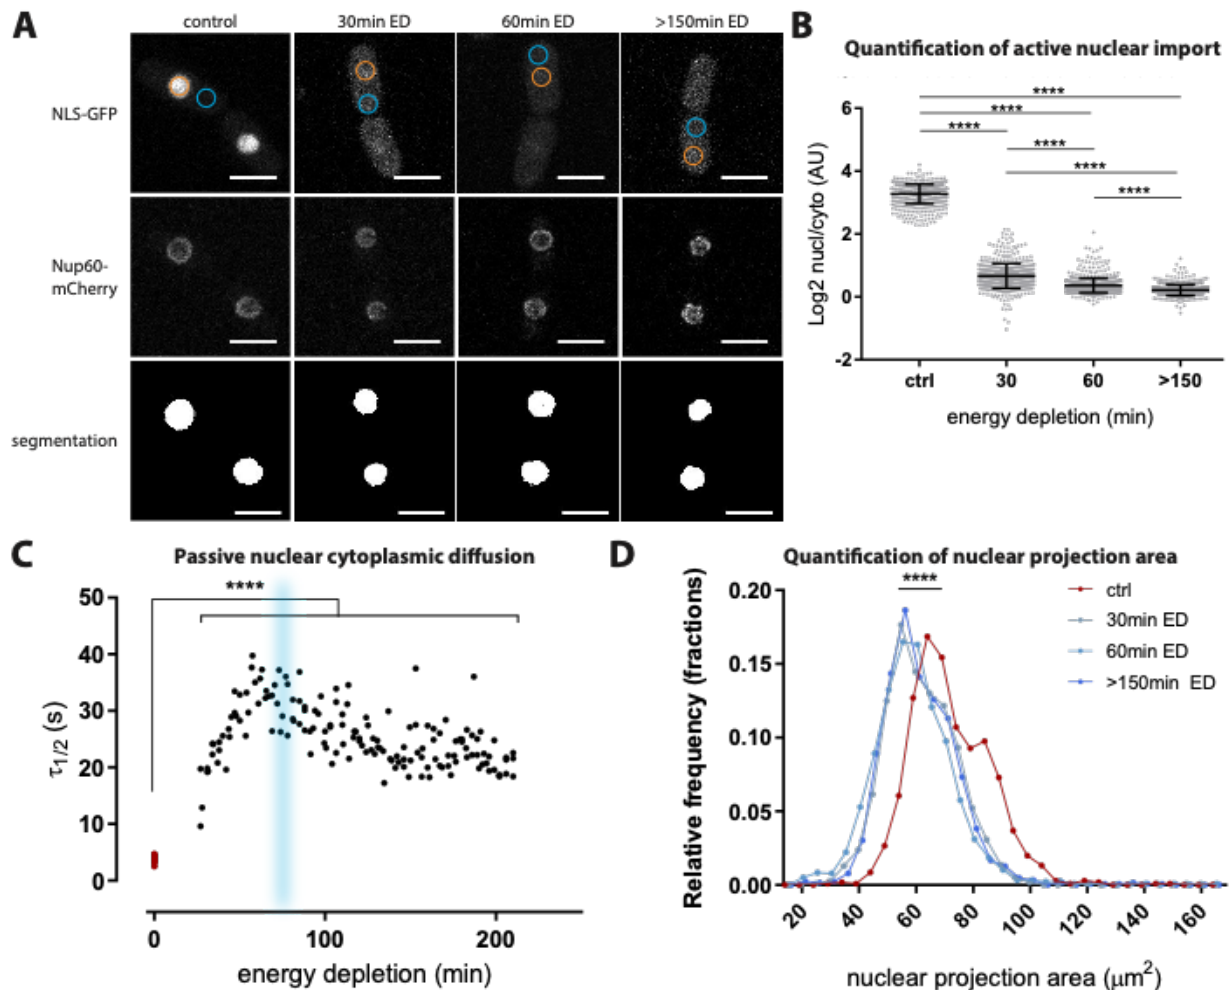

374

375 **Figure 4 How energy depletion affects transport across the nuclear envelope and nuclear**

376 **size.** A) Maximum projected confocal stack from life cell imaging of NLS-GFP and Nup60-

377 mCherry are used to measure active nuclear transport and nuclear size during energy

378 depletion. Actively imported NLS-GFP loses its nuclear localization during ED indicating a

379 shutdown of active nuclear transport during ED. The nuclear projection area is reduced during

380 ED as determined by segmenting the Nup60-mCherry NE signal, indicating a reduced nuclear

381 volume. Orange (nuclear) and blue (cytoplasmic) circles indicate areas used for quantification

382 of the GFP signal. Nuclear projection areas were determined in the mCherry-channel using

383 automated segmentation (see Materials and Methods) (scale bar: 5 $\mu\text{m}$ ). B) Quantification of

384 nuclear/cytoplasmic signal shows a significant leakage of NLS-GFP into the cytoplasm and thus

385 indicates a shutdown of active nuclear transport already after 30 min of ED. The observed

386 mean log2 fold change were: 3.276 (n=623) under control conditions; 0.662 (n=584) after 30

387 min; 0.3654 (n=722) 60 min and 0.2144 (n=604) >150 min after ED (all adjusted p-values

388 <0.0001, ordinary one-way ANOVA and Tukey's multiple comparison test). C) FRAP-recovery



Zimmerli, Allegretti et al

389 half-life times of nuclear signal from freely diffusing GFP at various time points after ED are  
390 significantly longer during ED as compared to control conditions (red dots) (p-value <0.0001,  
391 two-sided unpaired t-test) indicating a general down regulation of passive diffusion under  
392 these conditions. Passive nuclear diffusion of free GFP reaches a minimum after ~ 1 hour of  
393 ED and subsequently recovers slightly, pointing to cellular adaptation. The blue area shows  
394 the timepoint at which cryo-EM grids were prepared for structural analysis of ED NPCs. D)  
395 Histogram of quantified nuclear projection areas measured in segmented mCherry-channel  
396 of life-cell imaging as shown in (A) reveal a significant shift towards smaller values during ED  
397 (blue curves) as compared to control conditions (red curve) indicating a general loss of nuclear  
398 volume during ED that also manifest in NE wrinkling as seen in (A) (all adjusted p-values are  
399 <0.0001, one-way ordinary ANOVA and Holm-Sidak's multiple comparison test with n=1056  
400 control, n=1168 30min, n=2153 60min and n=1255 >150min after ED).

401

402

403

## 404 **Supplementary Material**

405

406 **Materials and Methods**

407 **Supplementary figures 1-12**

408 **Supplementary tables 1-3**

409 **Supplementary videos 1-7**

410

## 411 **Author contributions**

412 CEZ conceived the project, designed and performed experiments, acquired all types of data,  
413 designed and established data analysis procedures, analyzed all types of data, wrote the  
414 manuscript; MA conceived the project, designed and performed experiments, acquired data,  
415 analyzed data, wrote the manuscript; VR analyzed data, wrote the manuscript; SG designed  
416 and performed experiments, acquired data; AOK analyzed data; IZ designed and performed  
417 experiments; AH designed and performed experiments; JM designed experiments, supervised  
418 the project, JK conceived the project, designed and established data analysis procedures,

Zimmerli, Allegretti et al

419 analyzed data, supervised the project, wrote the manuscript; MB conceived the project,  
420 designed experiments, supervised the project, wrote the manuscript.

421

## 422 **Competing interests**

423 Authors declare no competing interests.

424

## 425 **Data availability**

426 Associated with the manuscript are accession numbers EMD-11373, EMD-11374, EMD-  
427 11375. Integrative models will be deposited into the PDBDEV upon publication. The code,  
428 along the input files, for the modeling will be deposited in Zenodo upon publication.

429

## 430 **Acknowledgements**

431 We thank Beata Turoňová, Nikola Kellner, Wim Hagen, Felix Weiss, Christian Tischer, Janina  
432 Baumbach, Ed Hurt, Edward Lemke as well as all the members of the Mahamid, Kosinski and  
433 Beck laboratories for advice and support. We thank Ed Hurt, Buzz Baum, Thomas Schwartz  
434 and Christian Häring for providing yeast strains. We acknowledge support from the Electron  
435 Microscopy Core Facility, the Advanced Light Microscopy Facility and IT services of EMBL  
436 Heidelberg. MA was funded by an EMBO a long-term fellowship (ALTF-1389–2016); JM  
437 received funding from the European Research Council (ERC 3DCellPhase 760067). MB  
438 acknowledges funding by EMBL, the Max Planck Society and the European Research Council  
439 (ComplexAssembly 724349).

440

441

## 442 **References**

- 443 1. D. H. Lin, A. Hoelz, The Structure of the Nuclear Pore Complex (An Update). *Annu.*  
444 *Rev. Biochem.* **88**, 725–783 (2019).
- 445 2. M. Beck, S. Mosalaganti, J. Kosinski, From the resolution revolution to evolution:  
446 structural insights into the evolutionary relationships between vesicle coats and the  
447 nuclear pore. *Curr. Opin. Struct. Biol.* **52**, 32–40 (2018).
- 448 3. J. Mahamid, S. Pfeffer, M. Schaffer, E. Villa, R. Danev, L. K. Cuellar, F. Förster, A. A.

- 449 Hyman, J. M. Plitzko, W. Baumeister, Visualizing the molecular sociology at the HeLa  
450 cell nuclear periphery. *Science (80-. )*. **351**, 969–972 (2016).
- 451 4. M. Allegretti, C. E. Zimmerli, V. Rantos, F. Wilfling, P. Ronchi, H. K. H. Fung, C.-W. Lee,  
452 W. Hagen, B. Turonova, K. Karius, X. Zhang, C. Müller, Y. Schwab, J. Mahamid, B.  
453 Pfander, J. Kosinski, M. Beck, In cell architecture of the nuclear pore complex and  
454 snapshots of its turnover. *in revision* (2020).
- 455 5. G. J. Stanley, A. Fassati, B. W. Hoogenboom, Atomic force microscopy reveals  
456 structural variability amongst nuclear pore complexes. *Life Sci. Alliance*. **1** (2018),  
457 doi:10.26508/lisa.201800142.
- 458 6. M. Beck, V. Lůí, F. Förster, W. Baumeister, O. Medalia, V. Lucić, F. Förster, W.  
459 Baumeister, O. Medalia, Snapshots of nuclear pore complexes in action captured by  
460 cryo-electron tomography. *Nature*. **449**, 611–615 (2007).
- 461 7. J. Sellés, M. Penrad-Mobayed, C. Guillaume, A. Fuger, L. Auvray, O. Faklaris, F.  
462 Montel, Nuclear pore complex plasticity during developmental process as revealed by  
463 super-resolution microscopy. *Sci. Rep.* **7** (2017), doi:10.1038/s41598-017-15433-2.
- 464 8. S. Otsuka, A. M. Steyer, M. Schorb, J. K. Hériché, M. J. Hossain, S. Sethi, M. Kueblbeck,  
465 Y. Schwab, M. Beck, J. Ellenberg, Postmitotic nuclear pore assembly proceeds by  
466 radial dilation of small membrane openings. *Nat. Struct. Mol. Biol.* **25**, 21–28 (2018).
- 467 9. S. Otsuka, K. H. Bui, M. Schorb, M. Julius Hossain, A. Z. Politi, B. Koch, M. Eltsov, M.  
468 Beck, J. Ellenberg, Nuclear pore assembly proceeds by an inside-out extrusion of the  
469 nuclear envelope. *Elife*. **5** (2016), doi:10.7554/eLife.19071.
- 470 10. J. Koh, G. Blobel, Allosteric regulation in gating the central channel of the nuclear  
471 pore complex. *Cell*. **161**, 1361–1373 (2015).
- 472 11. A. C. Meinema, J. K. Laba, R. A. Hapsari, R. Otten, F. A. A. Mulder, A. Kralt, G. Van Den  
473 Bogaart, C. P. Lusk, B. Poolman, L. M. Veenhoff, Long unfolded linkers facilitate  
474 membrane protein import through the nuclear pore complex. *Science (80-. )*. **333**, 90–  
475 93 (2011).
- 476 12. R. Ungricht, M. Klann, P. Horvath, U. Kutay, Diffusion and retention are major  
477 determinants of protein targeting to the inner nuclear membrane. *J. Cell Biol.* **209**,  
478 687–704 (2015).
- 479 13. A. Boni, A. Z. Politi, P. Strnad, W. Xiang, M. J. Hossain, J. Ellenberg, Live imaging and  
480 modeling of inner nuclear membrane targeting reveals its molecular requirements in

- 481 mammalian cells. *J. Cell Biol.* **209**, 705–720 (2015).
- 482 14. H. Chug, S. Trakhanov, B. B. Hülsmann, T. Pleiner, D. Görlich, Crystal structure of the  
483 metazoan Nup62•Nup58•Nup54 nucleoporin complex. *Science (80-. )*. **350**, 106–110  
484 (2015).
- 485 15. T. Stuwe, C. J. Bley, K. Thierbach, S. Petrovic, S. Schilbach, D. J. Mayo, T. Perriches, E. J.  
486 Rundlet, Y. E. Jeon, L. N. Collins, F. M. Huber, D. H. Lin, M. Paduch, A. Koide, V. Lu, J.  
487 Fischer, E. Hurt, S. Koide, A. A. Kossiakoff, A. Hoelz, Architecture of the fungal nuclear  
488 pore inner ring complex. *Science (80-. )*. **350**, 56–64 (2015).
- 489 16. V. Shahin, T. Danker, K. Enss, R. Ossig, H. Oberleithner, Evidence for Ca<sup>2+</sup>- and ATP-  
490 sensitive peripheral channels in nuclear pore complexes. *FASEB J.* **15**, 1895–1901  
491 (2001).
- 492 17. D. Stoffler, K. N. Goldie, B. Feja, U. Aebi, Calcium-mediated structural changes of  
493 native nuclear pore complexes monitored by time-lapse atomic force microscopy. *J.*  
494 *Mol. Biol.* **287**, 741–752 (1999).
- 495 18. A. Rakowska, T. Danker, S. W. Schneider, H. Oberleithner, ATP-induced shape change  
496 of nuclear pores visualized with the atomic force microscope. *J. Membr. Biol.* **163**,  
497 129–136 (1998).
- 498 19. L. Kastrup, H. Oberleithner, Y. Ludwig, C. Schafer, V. Shahin, Nuclear envelope barrier  
499 leak induced by dexamethasone. *J. Cell. Physiol.* **206**, 428–434 (2006).
- 500 20. I. Liashkovich, A. Meyring, A. Kramer, V. Shahin, Exceptional structural and  
501 mechanical flexibility of the nuclear pore complex. *J. Cell. Physiol.* **226**, 675–682  
502 (2011).
- 503 21. R. D. Jäggi, A. Franco-Obregón, P. Mühlhäusser, F. Thomas, U. Kutay, K. Ensslin,  
504 Modulation of nuclear pore topology by transport modifiers. *Biophys. J.* **84**, 665–670  
505 (2003).
- 506 22. D. Görlich, N. Panté, U. Kutay, U. Aebi, F. R. Bischoff, Identification of different roles  
507 for RanGDP and RanGTP in nuclear protein import. *EMBO J.* **15**, 5584–5594 (1996).
- 508 23. M. Stewart, Nuclear export of mRNA. *Trends Biochem. Sci.* **35** (2010), pp. 609–617.
- 509 24. W. D. Richardson, A. D. Mills, S. M. Dilworth, R. A. Laskey, C. Dingwall, Nuclear protein  
510 migration involves two steps: Rapid binding at the nuclear envelope followed by  
511 slower translocation through nuclear pores. *Cell.* **52**, 655–664 (1988).
- 512 25. N. Shulga, P. Roberts, Z. Gu, L. Spitz, M. M. Tabb, M. Nomura, D. S. Goldfarb, “In vivo

- 513 nuclear transport kinetics in *Saccharomyces cerevisiae*: A role for heat shock protein  
514 70 during targeting and translocation" (1996), , doi:10.1083/jcb.135.2.329.
- 515 26. W. A. Whalen, J. H. Yoon, R. Shen, R. Dhar, Regulation of mRNA export by nutritional  
516 status in fission yeast. *Genetics*. **152**, 827–838 (1999).
- 517 27. E. D. Schwoebel, T. H. Ho, M. S. Moore, The mechanism of inhibition of Ran-  
518 dependent nuclear transport by cellular ATP depletion. *J. Cell Biol.* **157**, 963–974  
519 (2002).
- 520 28. M. C. Munder, D. Midtvedt, T. Franzmann, E. Nüske, O. Otto, M. Herbig, E. Ulbricht, P.  
521 Müller, A. Taubenberger, S. Maharana, L. Malinovska, D. Richter, J. Guck, V.  
522 Zaburdaev, S. Alberti, A pH-driven transition of the cytoplasm from a fluid- to a solid-  
523 like state promotes entry into dormancy. *Elife*. **5** (2016), doi:10.7554/eLife.09347.
- 524 29. R. P. Joyner, J. H. Tang, J. Helenius, E. Dultz, C. Brune, L. J. Holt, S. Huet, D. J. Müller, K.  
525 Weis, A glucose-starvation response regulates the diffusion of macromolecules. *Elife*.  
526 **5** (2016), doi:10.7554/eLife.09376.
- 527 30. G. Marini, E. Nüske, W. Leng, S. Alberti, G. Pigino, Reorganization of budding yeast  
528 cytoplasm upon energy depletion. *Mol. Biol. Cell.* **31**, 1232–1245 (2020).
- 529 31. M. B. Heimlicher, M. Bächler, M. Liu, C. Ibeneche-Nnewiwe, E. L. Florin, A. Hoenger, D.  
530 Brunner, Reversible solidification of fission yeast cytoplasm after prolonged nutrient  
531 starvation. *J. Cell Sci.* **132** (2019), doi:10.1242/jcs.231688.
- 532 32. K. H. Bui, A. Von Appen, A. L. DiGuilio, A. Ori, L. Sparks, M. T. Mackmull, T. Bock, W.  
533 Hagen, A. Andrés-Pons, J. S. Glavy, M. Beck, Integrated structural analysis of the  
534 human nuclear pore complex scaffold. *Cell*. **155**, 1233–1243 (2013).
- 535 33. M. Eibauer, M. Pellanda, Y. Turgay, A. Dubrovsky, A. Wild, O. Medalia, Structure and  
536 gating of the nuclear pore complex. *Nat. Commun.* **6** (2015),  
537 doi:10.1038/ncomms8532.
- 538 34. Y. Zhang, S. Li, C. Zeng, G. Huang, X. Zhu, Q. Wang, K. Wang, Q. Zhou, C. Yan, W.  
539 Zhang, G. Yang, M. Liu, Q. Tao, J. Lei, Y. Shi, Molecular architecture of the luminal ring  
540 of the *Xenopus laevis* nuclear pore complex. *Cell Res.* **30**, 532–540 (2020).
- 541 35. A. von Appen, J. Kosinski, L. Sparks, A. Ori, A. L. DiGuilio, B. Vollmer, M.-T. T.  
542 Mackmull, N. Banterle, L. Parca, P. Kastiris, K. Buczak, S. Mosalaganti, W. Hagen, A.  
543 Andres-Pons, E. A. Lemke, P. Bork, W. Antonin, J. S. Glavy, K. H. Bui, M. Beck, In situ  
544 structural analysis of the human nuclear pore complex. *Nature*. **526**, 140–143 (2015).

Zimmerli, Allegretti et al

- 545 36. J. Kosinski, S. Mosalaganti, A. Von Appen, R. Teimer, A. L. Diguilio, W. Wan, K. H. Bui,  
546 W. J. H. Hagen, J. A. G. Briggs, J. S. Glavy, E. Hurt, M. Beck, Molecular architecture of  
547 the inner ring scaffold of the human nuclear pore complex. *Science (80-. )*. **352**, 363–  
548 365 (2016).
- 549 37. G. Huang, Y. Zhang, X. Zhu, C. Zeng, Q. Wang, Q. Zhou, Q. Tao, M. Liu, J. Lei, C. Yan, Y.  
550 Shi, Structure of the cytoplasmic ring of the *Xenopus laevis* nuclear pore complex by  
551 cryo-electron microscopy single particle analysis. *Cell Res.* **30**, 520–531 (2020).
- 552 38. S. Mosalaganti, J. Kosinski, S. Albert, M. Schaffer, D. Strenkert, P. A. Salomé, S. S.  
553 Merchant, J. M. Plitzko, W. Baumeister, B. D. Engel, M. Beck, In situ architecture of  
554 the algal nuclear pore complex. *Nat. Commun.* **9**, 2361 (2018).
- 555 39. H. Asakawa, T. Kojidani, H. J. Yang, C. Ohtsuki, H. Osakada, A. Matsuda, M. Iwamoto,  
556 Y. Chikashige, K. Nagao, C. Obuse, Y. Hiraoka, T. Haraguchi, Asymmetrical localization  
557 of nup107-160 subcomplex components within the nuclear pore complex in fission  
558 yeast. *PLoS Genet.* **15**, 223131 (2019).
- 559 40. P. Stelter, R. Kunze, D. Flemming, D. Höpfner, M. Diepholz, P. Philippsen, B. Böttcher,  
560 E. Hurt, Molecular basis for the functional interaction of dynein light chain with the  
561 nuclear-pore complex. *Nat. Cell Biol.* **9**, 788–796 (2007).
- 562 41. S. W. Bai, J. Rouquette, M. Umeda, W. Faigle, D. Loew, S. Sazer, V. Doye, The Fission  
563 Yeast Nup107-120 Complex Functionally Interacts with the Small GTPase Ran/Spi1  
564 and Is Required for mRNA Export, Nuclear Pore Distribution, and Proper Cell Division.  
565 *Mol. Cell. Biol.* **24**, 6379–6392 (2004).
- 566 42. X. Liu, J. M. Mitchell, R. W. Wozniak, G. Blobel, J. Fan, Structural evolution of the  
567 membrane-coating module of the nuclear pore complex. *Proc. Natl. Acad. Sci. U. S. A.*  
568 **109**, 16498–16503 (2012).
- 569 43. S. Bilokapic, T. U. Schwartz, Molecular basis for Nup37 and ELY5/ELYS recruitment to  
570 the nuclear pore complex. *Proc. Natl. Acad. Sci. U. S. A.* **109**, 15241–15246 (2012).
- 571 44. B. A. Rasala, A. V. Orjalo, Z. Shen, S. Briggs, D. J. Forbes, ELYS is a dual  
572 nucleoporin/kinetochore protein required for nuclear pore assembly and proper cell  
573 division. *Proc. Natl. Acad. Sci. U. S. A.* **103**, 17801–17806 (2006).
- 574 45. S. J. Kim, J. Fernandez-Martinez, I. Nudelman, Y. Shi, W. Zhang, B. Raveh, T. Herricks,  
575 B. D. Slaughter, J. A. Hogan, P. Upla, I. E. Chemmama, R. Pellarin, I. Echeverria, M.  
576 Shivaraju, A. S. Chaudhury, J. Wang, R. Williams, J. R. Unruh, C. H. Greenberg, E. Y.

- 577 Jacobs, Z. Yu, M. J. De La Cruz, R. Mironska, D. L. Stokes, J. D. Aitchison, M. F. Jarrold,  
578 J. L. Gerton, S. J. Ludtke, C. W. Akey, B. T. Chait, A. Sali, M. P. Rout, Integrative  
579 structure and functional anatomy of a nuclear pore complex. *Nature*. **555**, 475–482  
580 (2018).
- 581 46. T. Maimon, N. Elad, I. Dahan, O. Medalia, The human nuclear pore complex as  
582 revealed by cryo-electron tomography. *Structure*. **20**, 998–1006 (2012).
- 583 47. H. Chug, S. Trakhanov, B. B. Hülsmann, T. Pleiner, D. Görlich, Crystal structure of the  
584 metazoan Nup62•Nup58•Nup54 nucleoporin complex. *Science (80-. )*. **350**, 106–110  
585 (2015).
- 586 48. R. W. Wozniak, G. Blobel, M. P. Rout, POM152 is an integral protein of the pore  
587 membrane domain of the yeast nuclear envelope. *J. Cell Biol.* **125**, 31–42 (1994).
- 588 49. P. Upla, S. J. Kim, P. Sampathkumar, K. Dutta, S. M. Cahill, I. E. Chemmama, R.  
589 Williams, J. B. Bonanno, W. J. Rice, D. L. Stokes, D. Cowburn, S. C. Almo, A. Sali, M. P.  
590 Rout, J. Fernandez-Martinez, Molecular Architecture of the Major Membrane Ring  
591 Component of the Nuclear Pore Complex. *Structure*. **25**, 434–445 (2017).
- 592 50. A. Elosegui-Artola, I. Andreu, A. E. M. Beedle, A. Lezamiz, M. Uroz, A. J. Kosmalska, R.  
593 Oria, J. Z. Kechagia, P. Rico-Lastres, A. L. Le Roux, C. M. Shanahan, X. Trepast, D.  
594 Navajas, S. Garcia-Manyes, P. Roca-Cusachs, Force Triggers YAP Nuclear Entry by  
595 Regulating Transport across Nuclear Pores. *Cell*. **171**, 1397-1410.e14 (2017).
- 596 51. K. Kelley, K. E. Knockenhauer, G. Kabachinski, T. U. Schwartz, Atomic structure of the  
597  $\gamma$  complex of the nuclear pore. *Nat. Struct. Mol. Biol.* **22**, 425–431 (2015).
- 598 52. K. Thierbach, A. von Appen, M. Thoms, M. Beck, D. Flemming, E. Hurt, Protein  
599 Interfaces of the Conserved Nup84 Complex from *Chaetomium thermophilum* Shown  
600 by Crosslinking Mass Spectrometry and Electron Microscopy. *Structure*. **21**, 1672–  
601 1682 (2013).
- 602 53. S. Krull, J. Dörries, B. Boysen, S. Reidenbach, L. Magnius, H. Norder, J. Thyberg, V. C.  
603 Cordes, Protein Tpr is required for establishing nuclear pore-associated zones of  
604 heterochromatin exclusion. *EMBO J.* **29**, 1659–1673 (2010).
- 605 54. S. A. Nordeen, D. L. Turman, T. U. Schwartz, *bioRxiv*, in press,  
606 doi:10.1101/2020.06.19.161133.
- 607 55. E. Nüske, G. Marini, D. Richter, W. Leng, A. Bogdanova, T. M. Franzmann, G. Pigino, S.  
608 Alberti, *Biol. Open*, in press, doi:10.1242/bio.046391.

Zimmerli, Allegretti et al

- 609 56. B. R. Parry, I. V. Surovtsev, M. T. Cabeen, C. S. O’Hern, E. R. Dufresne, C. Jacobs-  
610 Wagner, The bacterial cytoplasm has glass-like properties and is fluidized by  
611 metabolic activity. *Cell*. **156**, 183–194 (2014).
- 612 57. B. L. Timney, B. Raveh, R. Mironska, J. M. Trivedi, S. J. Kim, D. Russel, S. R. Wentz, A.  
613 Sali, M. P. Rout, Simple rules for passive diffusion through the nuclear pore complex.  
614 *J. Cell Biol.* **215** (2016), doi:10.1083/jcb.201601004.
- 615 58. S. Frey, D. Görlich, FG/FxFG as well as GLFG repeats form a selective permeability  
616 barrier with self-healing properties. *EMBO J.* **28**, 2554–2567 (2009).
- 617 59. D. Mohr, S. Frey, T. Fischer, T. Güttler, D. Görlich, Characterisation of the passive  
618 permeability barrier of nuclear pore complexes. *EMBO J.* **28**, 2541–2553 (2009).
- 619 60. R. Frost, D. Débarre, S. Jana, F. Bano, J. Schünemann, D. Görlich, R. P. Richter, “A  
620 method to quantify molecular diffusion within thin solvated polymer films: A case  
621 study on films of natively unfolded nucleoporins.”
- 622 61. S. R. Solmaz, G. Blobel, I. Melcák, Ring cycle for dilating and constricting the nuclear  
623 pore. *Proc. Natl. Acad. Sci. U. S. A.* **110**, 5858–5863 (2013).
- 624 62. J. Fernandez-Martinez, S. J. Kim, Y. Shi, P. Upla, R. Pellarin, M. Gagnon, I. E.  
625 Chemmama, J. Wang, I. Nudelman, W. Zhang, R. Williams, W. J. Rice, D. L. Stokes, D.  
626 Zenklusen, B. T. Chait, A. Sali, M. P. Rout, Structure and Function of the Nuclear Pore  
627 Complex Cytoplasmic mRNA Export Platform. *Cell*. **167**, 1215-1228.e25 (2016).
- 628 63. N. Kellner, J. Schwarz, M. Sturm, J. Fernandez-Martinez, S. Griesel, W. Zhang, B. T.  
629 Chait, M. P. Rout, U. Kück, E. Hurt, Developing genetic tools to exploit *Chaetomium*  
630 thermophilum for biochemical analyses of eukaryotic macromolecular assemblies.  
631 *Sci. Rep.* **6**, 20937 (2016).
- 632 64. H. Amelina, V. Moiseeva, L. C. Collopy, S. R. Pearson, C. A. Armstrong, K. Tomita,  
633 Sequential and counter-selectable cassettes for fission yeast. *BMC Biotechnol.* **16**, 76  
634 (2016).
- 635 65. J. Bähler, J. Wu, M. S. Longtine, N. G. Shah, A. M. III, A. B. Steever, A. Wach, P.  
636 Philippsen, J. R. Pringle, Heterologous modules for efficient and versatile PCR-based  
637 gene targeting in *Schizosaccharomyces pombe*. *Yeast*. **14**, 943–951 (1998).
- 638 66. G. Dey, S. Culley, S. A. Curran, R. Henriques, W. Kukulski, B. Baum, Closed mitosis  
639 requires local disassembly of the nuclear envelope. *bioRxiv*, 779769 (2019).
- 640 67. A. Vještica, M. Marek, P. Nkosi, L. Merlini, G. Liu, M. Bérard, I. Billault-Chaumartin, S.



- 641 G. Martin, A toolbox of stable integration vectors in the fission yeast  
642 *Schizosaccharomyces pombe*. *J. Cell Sci.* **133** (2020), doi:10.1242/jcs.240754.
- 643 68. J. Schindelin, I. Arganda-Carreras, E. Frise, V. Kaynig, M. Longair, T. Pietzsch, S.  
644 Preibisch, C. Rueden, S. Saalfeld, B. Schmid, J. Y. Tinevez, D. J. White, V. Hartenstein,  
645 K. Eliceiri, P. Tomancak, A. Cardona, Fiji: An open-source platform for biological-image  
646 analysis. *Nat. Methods.* **9** (2012), pp. 676–682.
- 647 69. S. Berg, D. Kutra, T. Kroeger, C. N. Straehle, B. X. Kausler, C. Haubold, M. Schiegg, J.  
648 Ales, T. Beier, M. Rudy, K. Eren, J. I. Cervantes, B. Xu, F. Beuttenmueller, A. Wolny, C.  
649 Zhang, U. Koethe, F. A. Hamprecht, A. Kreshuk, ilastik: interactive machine learning  
650 for (bio)image analysis. *Nat. Methods.* **16**, 1226–1232 (2019).
- 651 70. A. Halavatyi, S. Terjung, in *Standard and Super-Resolution Bioimaging Data Analysis*  
652 (John Wiley & Sons, Ltd, 2017), pp. 99–141.
- 653 71. W. J. H. Hagen, W. Wan, J. A. G. Briggs, Implementation of a cryo-electron  
654 tomography tilt-scheme optimized for high resolution subtomogram averaging. *J.*  
655 *Struct. Biol.* **197**, 191–198 (2017).
- 656 72. R. Danev, B. Buijsse, M. Khoshouei, J. M. Plitzko, W. Baumeister, Volta potential  
657 phase plate for in-focus phase contrast transmission electron microscopy. *Proc. Natl.*  
658 *Acad. Sci. U. S. A.* **111**, 15635–40 (2014).
- 659 73. D. N. Mastronarde, S. R. Held, Automated tilt series alignment and tomographic  
660 reconstruction in IMOD. *J. Struct. Biol.* **197**, 102–113 (2017).
- 661 74. D. N. Mastronarde, Dual-Axis Tomography: An Approach with Alignment Methods  
662 That Preserve Resolution. *J. Struct. Biol.* **120**, 343–352 (1997).
- 663 75. B. Turoňová, F. K. M. Schur, W. Wan, J. A. G. Briggs, Efficient 3D-CTF correction for  
664 cryo-electron tomography using NovaCTF improves subtomogram averaging  
665 resolution to 3.4 Å. *J. Struct. Biol.* **199**, 187–195 (2017).
- 666 76. B. Turoňová, M. Sikora, C. Schürmann, W. J. H. Hagen, S. Welsch, F. E. C. Blanc, S. von  
667 Bülow, M. Gecht, K. Bagola, C. Hörner, G. van Zandbergen, S. Mosalaganti, A.  
668 Schwarz, R. Covino, M. D. Mühlebach, G. Hummer, J. K. Locker, M. Beck, *bioRxiv*, in  
669 press, doi:10.1101/2020.06.26.173476.
- 670 77. G. Tang, L. Peng, P. R. Baldwin, D. S. Mann, W. Jiang, I. Rees, S. J. Ludtke, EMAN2: An  
671 extensible image processing suite for electron microscopy. *J. Struct. Biol.* **157**, 38–46  
672 (2007).

- 673 78. B. Turoňová, W. J. H. Hagen, M. Obr, S. Mosalaganti, J. W. Beugelink, C. E. Zimmerli,  
674 H. G. Kräusslich, M. Beck, Benchmarking tomographic acquisition schemes for high-  
675 resolution structural biology. *Nat. Commun.* **11**, 1–9 (2020).
- 676 79. E. F. Pettersen, T. D. Goddard, C. C. Huang, G. S. Couch, D. M. Greenblatt, E. C. Meng,  
677 T. E. Ferrin, UCSF Chimera - A visualization system for exploratory research and  
678 analysis. *J. Comput. Chem.* **25**, 1605–1612 (2004).
- 679 80. L. Zimmermann, A. Stephens, S. Z. Nam, D. Rau, J. Kübler, M. Lozajic, F. Gabler, J.  
680 Söding, A. N. Lupas, V. Alva, A Completely Reimplemented MPI Bioinformatics Toolkit  
681 with a New HHpred Server at its Core. *J. Mol. Biol.* **430**, 2237–2243 (2018).
- 682 81. N. Guex, M. C. Peitsch, SWISS-MODEL and the Swiss-PdbViewer: An environment for  
683 comparative protein modeling. *Electrophoresis.* **18**, 2714–2723 (1997).
- 684 82. A. Šali, T. L. Blundell, Comparative protein modelling by satisfaction of spatial  
685 restraints. *J. Mol. Biol.* **234**, 779–815 (1993).
- 686 83. T. Stuwe, A. R. Correia, D. H. Lin, M. Paduch, V. T. Lu, A. A. Kossiakoff, A. Hoelz,  
687 Architecture of the nuclear pore complex coat. *Science (80-. )*. **347**, 1148–1152  
688 (2015).
- 689 84. D. H. Lin, T. Stuwe, S. Schilbach, E. J. Rundlet, T. Perriches, G. Mobbs, Y. Fan, K.  
690 Thierbach, F. M. Huber, L. N. Collins, A. M. Davenport, Y. E. Jeon, A. Hoelz,  
691 Architecture of the symmetric core of the nuclear pore. *Science (80-. )*. **352**, aaf1015–  
692 aaf1015 (2016).
- 693 85. C. S. Weirich, J. P. Erzberger, J. M. Berger, K. Weis, The N-terminal domain of Nup159  
694 forms a  $\beta$ -propeller that functions in mRNA export by tethering the helicase Dbp5 to  
695 the nuclear pore. *Mol. Cell.* **16**, 749–760 (2004).
- 696 86. K. Yoshida, H. S. Seo, E. W. Debler, G. Blobel, A. Hoelz, Structural and functional  
697 analysis of an essential nucleoporin heterotrimer on the cytoplasmic face of the  
698 nuclear pore complex. *Proc. Natl. Acad. Sci. U. S. A.* **108**, 16571–16576 (2011).
- 699 87. K. Strimmer, fdrtool: A versatile R package for estimating local and tail area-based  
700 false discovery rates. *Bioinformatics.* **24**, 1461–1462 (2008).
- 701 88. Y. Benjamini, Y. Hochberg, Controlling the false discovery rate: a practical and  
702 powerful approach to multiple testing. *J. R. Stat. Soc. Ser. B.* **57**, 289–300 (1995).
- 703 89. T. D. Goddard, C. C. Huang, E. C. Meng, E. F. Pettersen, G. S. Couch, J. H. Morris, T. E.  
704 Ferrin, UCSF ChimeraX: Meeting modern challenges in visualization and analysis.

Zimmerli, Allegretti et al

- 705            *Protein Sci.* **27**, 14–25 (2018).
- 706    90.    B. Webb, S. Viswanath, M. Bonomi, R. Pellarin, C. H. Greenberg, D. Saltzberg, A. Sali,  
707            Integrative structure modeling with the Integrative Modeling Platform. *Protein Sci.*  
708            **27**, 245–258 (2018).
- 709    91.    D. Saltzberg, C. H. Greenberg, S. Viswanath, I. Chemmama, B. Webb, R. Pellarin, I.  
710            Echeverria, A. Sali, in *Methods in Molecular Biology* (Humana Press Inc., 2019;  
711            <https://pubmed.ncbi.nlm.nih.gov/31396911/>), vol. 2022, pp. 353–377.
- 712    92.    G. Drin, J. F. Casella, R. Gautier, T. Boehmer, T. U. Schwartz, B. Antonny, A general  
713            amphipathic  $\alpha$ -helical motif for sensing membrane curvature. *Nat. Struct. Mol. Biol.*  
714            **14**, 138–146 (2007).
- 715    93.    H. Asakawa, H.-J. Yang, T. G. Yamamoto, C. Ohtsuki, Y. Chikashige, K. Sakata-Sogawa,  
716            M. Tokunaga, M. Iwamoto, Y. Hiraoka, T. Haraguchi, Characterization of nuclear pore  
717            complex components in fission yeast *Schizosaccharomyces pombe*. *Nucleus*. **5**, 149–  
718            162 (2014).
- 719
- 720
